# Supplementary material for: Core-Shell Magnetic Nanoparticles for Highly Sensitive Magnetoelastic Immunosensor
Source: PubMed Central journal article supplement (PMC7466411; doi:10.3390/nano10081526), 2020-08-04
Supplement: nanomaterials-10-01526-s001.pdf [file nanomaterials-10-01526-s001.pdf]

## SUPPLEMENTARY MATERIALS

# Core-shell Magnetic Nanoparticles for highly sensitive Magnetoelastic Immunosensor

Raffaele Campanile <sup>1,2</sup>, Emanuela Scardapane <sup>1,2</sup>, Antonio Forente <sup>1</sup>, Carmine Granata <sup>3</sup>, Roberto Germano <sup>2</sup>, Rocco Di Girolamo <sup>4</sup>, Antonio Minopoli <sup>1</sup>, Raffaele Velotta <sup>1,3</sup>, Bartolomeo Della Ventura <sup>1,3</sup>, Vincenzo Iannotti <sup>1,5,\*</sup>

<sup>1</sup> Department of Physics “E. Pancini”, University of Naples Federico II, Via Cintia 26, I-80126 Napoli, Italy; raffaele.campanile@unina.it (R.C); emanuela.scardapane@unina.it (E.S); a.forente@studenti.unina.it (A.F); antonio.minopoli2@unina.it (A.M); rvelotta@unina.it (R.V); Bartolomeo.dellaventura@unina.it (B.D.V).

<sup>2</sup> PROMETE Srl, CNR Spin off, Piazzale Tecchio, 45 80125 Napoli (NA), Italy germano@promete.it (R.G.).

<sup>3</sup> Institute of Applied Sciences and Intelligent Systems of the National Research Council (CNR-ISASI), Via Campi Flegrei 34, I-80078 Pozzuoli (NA), Italy; c.granata@isasi.cnr.it (C.G.).

<sup>4</sup> Department of Chemistry, University of Naples “Federico II”, Via Cintia 26, I-80126 Napoli, Italy; rocco.digirolamo@unina.it (R.D.G.).

<sup>5</sup> Institute for Superconducting, Oxides and other Innovative Materials and Devices of the National Research Council (CNR-SPIN), Piazzale V. Tecchio 80, I-80125 Napoli, Italy

\* Correspondence: viannotti@unina.it ; Tel.: 081 7682419 (V.I.)

## Hysteresis loop of Fe<sub>3</sub>O<sub>4</sub> NPs

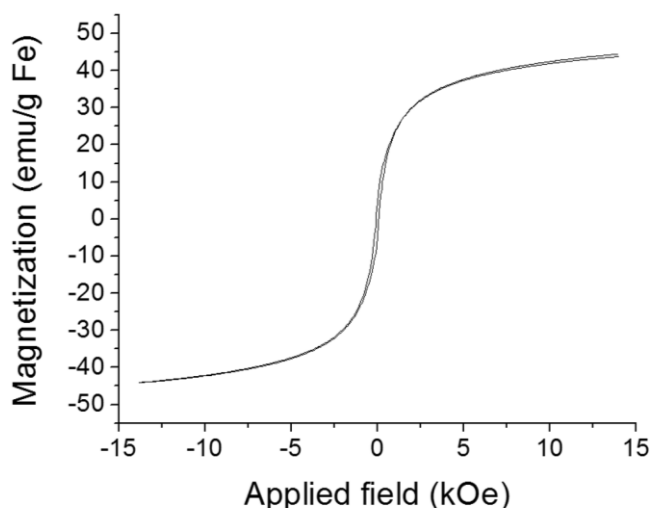

Figure S1. Room-temperature M-H curve of the magnetite samples [supplied by the nanoparticles manufacturer (Ocean Nano Tech, LLC)] measured by cycling the external magnetic field between  $-14000$  Oe and  $14000$  Oe. This magnetization curve shows a very small hysteresis behavior for the samples and exhibits small values of coercive field and remnant magnetization. This indicates that the nanoparticles can safely be considered as superparamagnetic.
